# Supplementary material for: CTAB induced mitochondrial apoptosis by activating the AMPK–p53 pathway in hepatocarcinoma cells
Source: Royal Society of Chemistry journal article supplement (doi:10.1039/c4tx00227j), 2015-01-01
Supplement: c4tx00227j1.pdf [file c4tx00227j1.pdf]

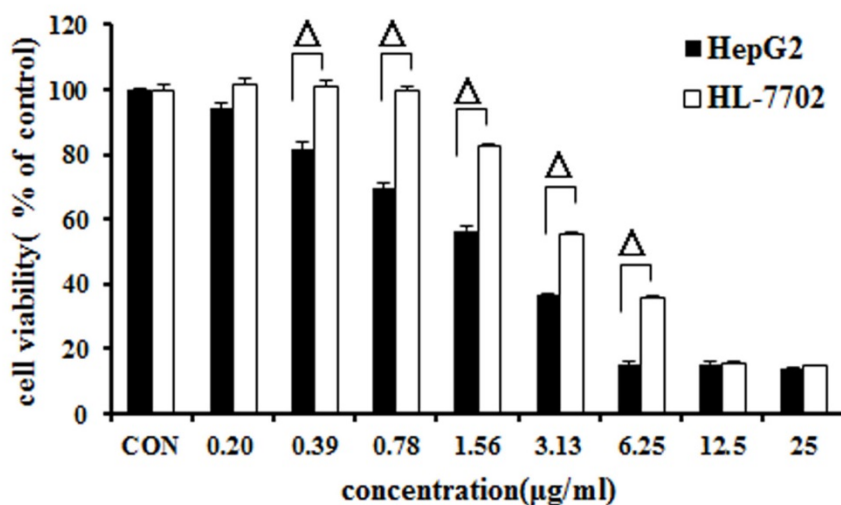

**Fig. S1** Effect of CTAB on cell viability on HepG2 cells and HL-7702 cell for 48 h. The experiments were performed in triplicate. Data presented as means  $\pm$  SD of three independent experiments.  $\Delta P < 0.05$ , HL-7702 cells treated with different concentration of CTAB for 48 h vs. HepG2 cells treated with different concentration of CTAB for 48 h.

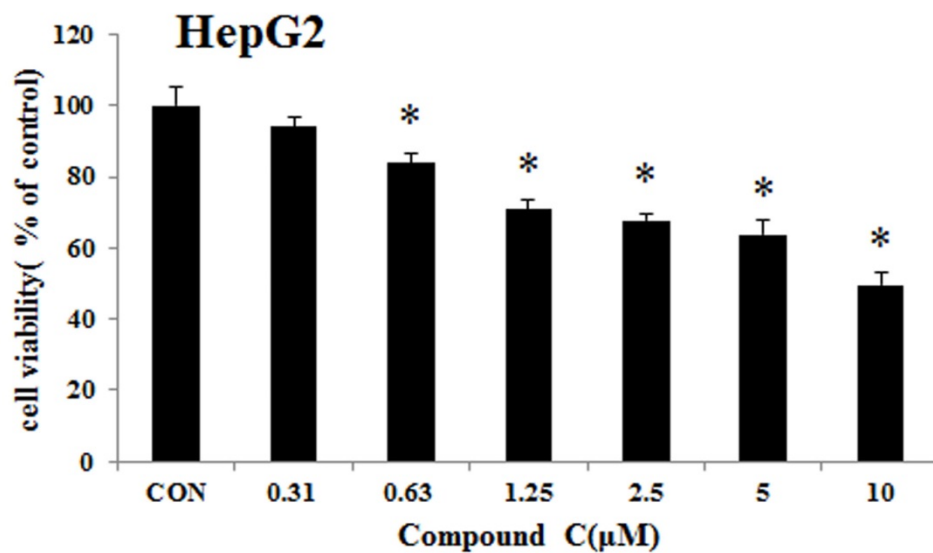

**Fig.S2** Effect of Compound C on cell viability on HepG2 cells for a 24 h treatment. The experiments were performed in triplicate. Data presented as means  $\pm$  SD of three independent experiments. \*  $P < 0.05$ , cells treated with different concentration of Compound C for 24 h compared with control group.
